CORRECTION

# Correction: A Streamlined System for Species Diagnosis in *Caenorhabditis* (Nematoda: Rhabditidae) with Name Designations for 15 Distinct Biological Species

The *PLOS ONE* Staff

In the subheading “Species diagnosis and naming for 15 species of *Caenorhabditis*” of Nomenclatural Acts, the following sentence was omitted from the paragraphs of description for all 15 species: “The type culture specimens are deposited at the *Caenorhabditis* Genetics Center (<http://www.cbs.umn.edu/research/resources/cgc>).”

## Reference

1. Félix M-A, Braendle C, Cutter AD (2014) A Streamlined System for Species Diagnosis in *Caenorhabditis* (Nematoda: Rhabditidae) with Name Designations for 15 Distinct Biological Species. *PLoS ONE* 9(4): e94723. doi: [10.1371/journal.pone.0094723](https://doi.org/10.1371/journal.pone.0094723) PMID: [24727800](https://pubmed.ncbi.nlm.nih.gov/24727800/)

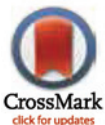

## OPEN ACCESS

**Citation:** The *PLOS ONE* Staff (2015) Correction: A Streamlined System for Species Diagnosis in *Caenorhabditis* (Nematoda: Rhabditidae) with Name Designations for 15 Distinct Biological Species. *PLoS ONE* 10(3): e0118327. doi:10.1371/journal.pone.0118327

**Published:** March 5, 2015

**Copyright:** © 2015 The *PLOS ONE* Staff. This is an open access article distributed under the terms of the [Creative Commons Attribution License](https://creativecommons.org/licenses/by/4.0/), which permits unrestricted use, distribution, and reproduction in any medium, provided the original author and source are credited.
